# Supplementary material
Source: PubMed Central journal article supplement (PMC3188883)

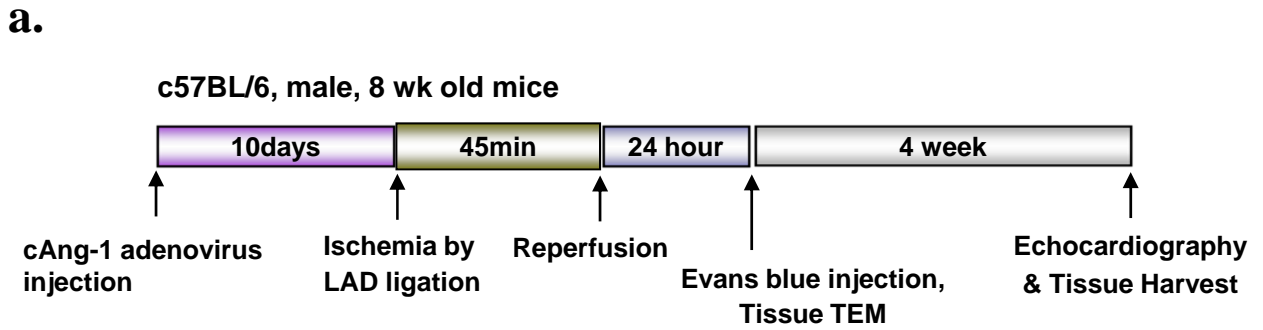

**b.**

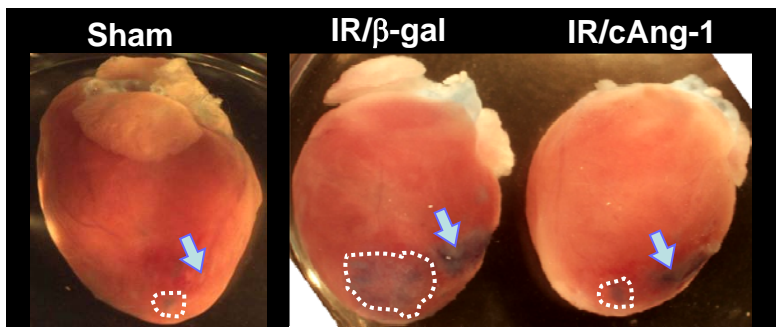

**c.**

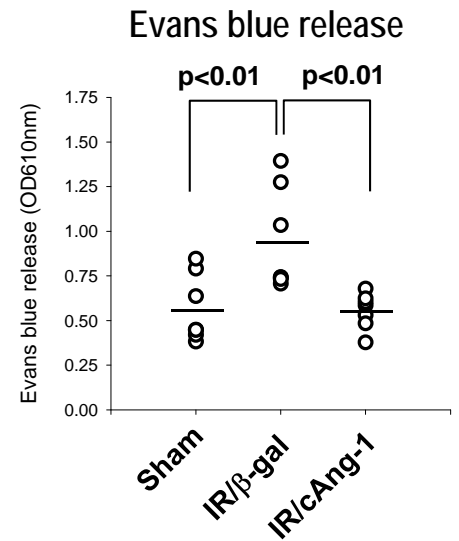

**a.**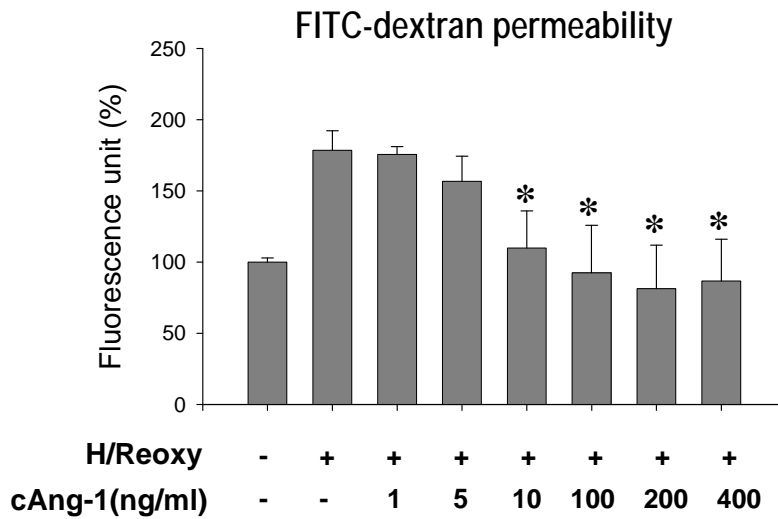**b.**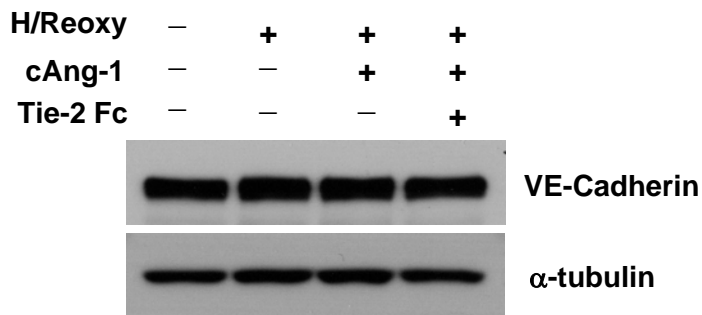**c.**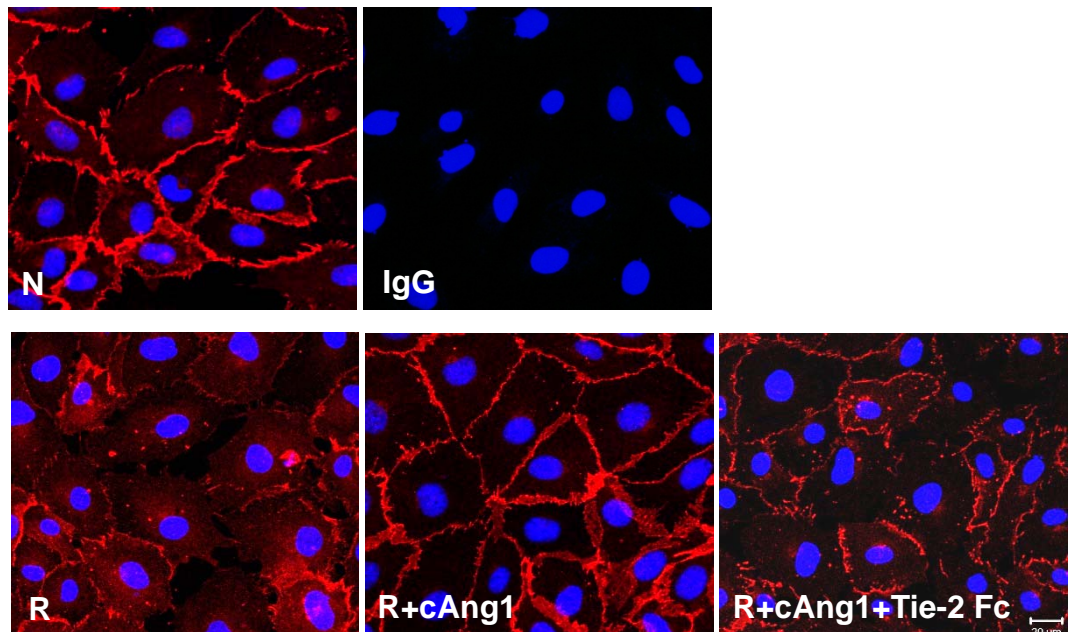

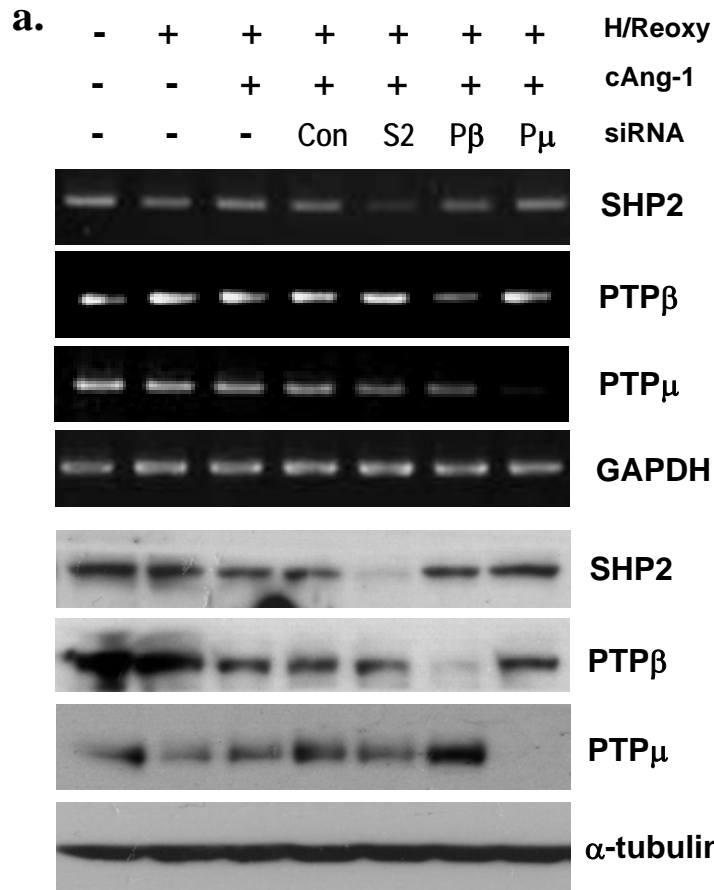**b.**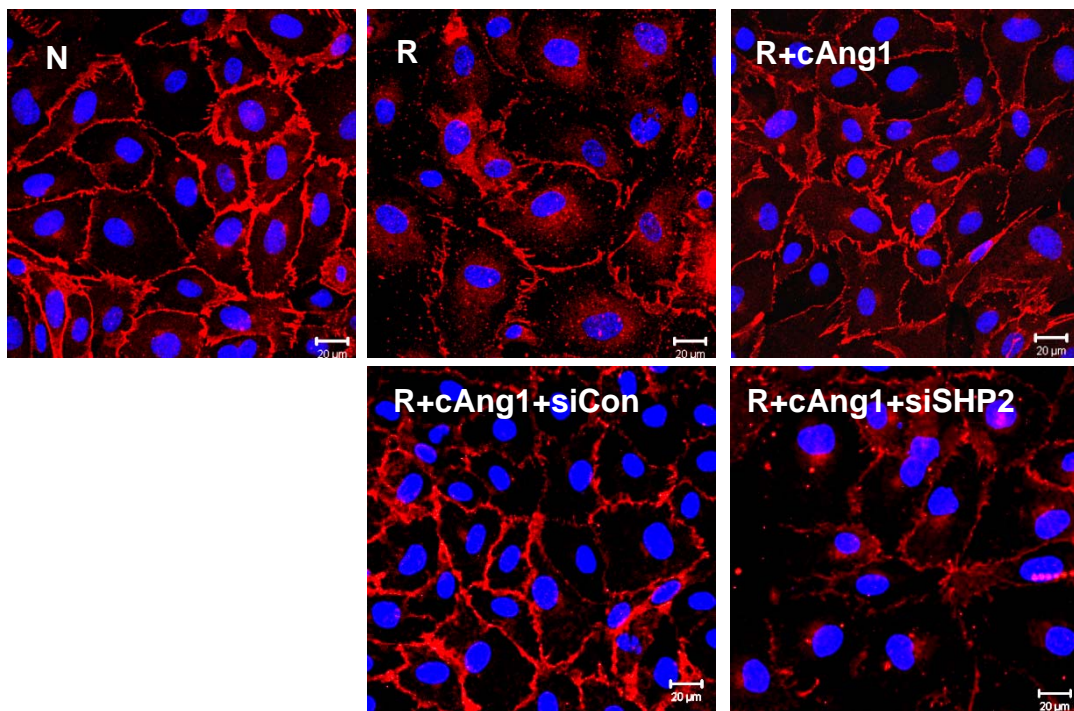

a.

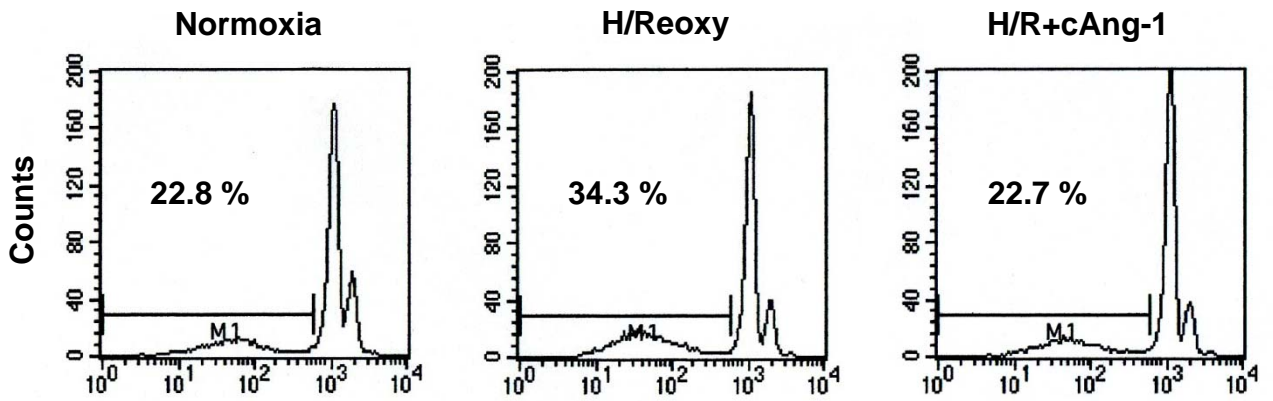

b.

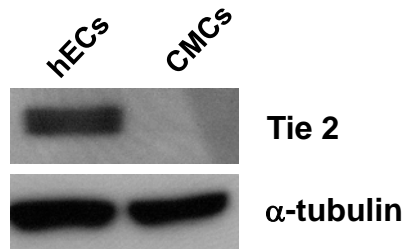

## Supplementary Figure S5

|               |   |   |   |     |           |           |            |
|---------------|---|---|---|-----|-----------|-----------|------------|
| H/Reoxy       | - | + | + | +   | +         | +         | +          |
| cAng-1        | - | - | + | +   | +         | +         | +          |
| anti-integrin | - | - | - | IgG | $\beta$ 1 | $\beta$ 3 | $\alpha$ 5 |

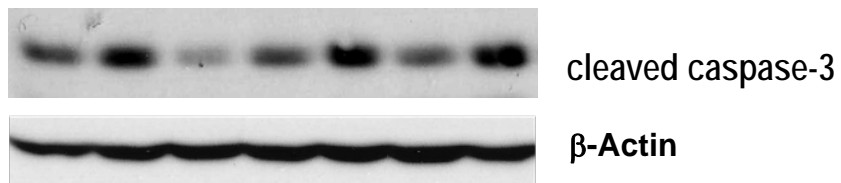

**a.**

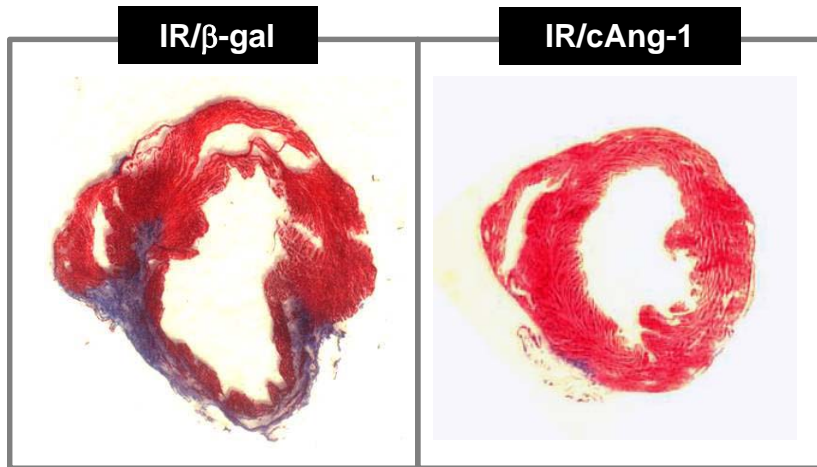

**b.**

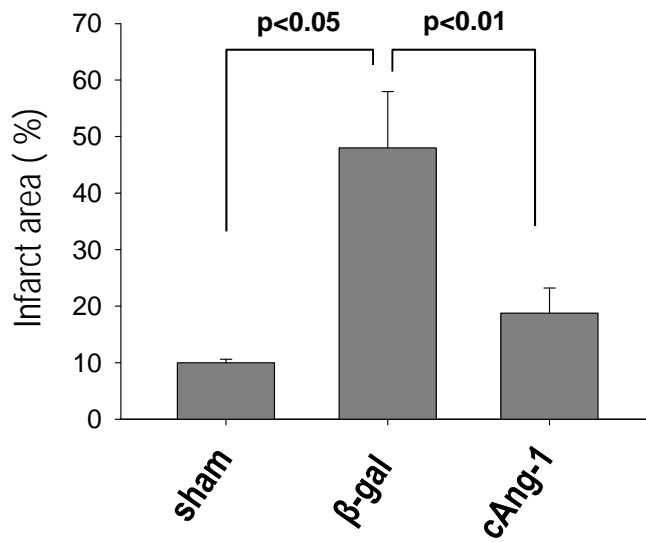

Supplement: 11_106_Lee_Suppl.pdf [file 11_106_Lee_Suppl.pdf]
